# Supplementary material for: Investigation of Nitrogen Conversion Efficiency in Hydrogen-based Autotrophic Nitrate Reduction Reactor
Source: Research Square preprint supplement (doi:10.21203/rs.3.rs-5965337/v1), 2025-02-10
Supplement: Supplementary file 1 [file 428e3092b3b7c4d58c5562fb.docx]

**Investigation of Nitrogen Conversion Efficiency in Hydrogen-based Autotrophic Nitrate Reduction Reactor**

Yu-Fei Zhao1, Chun-Yu Lai1, He-Ping Zhao1,*

1. MOE Key Lab of Environmental Remediation and Ecosystem Health, College of Environmental and Resource Science, Zhejiang University, Hangzhou, China, 310058.

* Correspondence to Dr. He-Ping Zhao. Tel (Fax): 0086-571-88982739, E-mail: zhaohp@zju.edu.cn

Table S1 Simulation of wastewater configuration components

|  | Concentration (mg/L) |
| --- | --- |
| KH2PO4 | 0.7 |
| MgSO4·7H2O | 5 |
| CaCl2·2H2O | 1 |
| FeSO4·7H2O | 1 |
| NaHCO3 | 10 |
| trace element solution | 1 |

Table S2 Components of trace element solution

|  | Concentration (mg/L) |
| --- | --- |
| ZnSO4·7H2O | 100 |
| MnCl2·4H2O | 30 |
| H3BO3 | 300 |
| CoCl2·6H2O | 300 |
| NiCl2·2H2O | 10 |
| Na2SO4·2H2O | 30 |
| Na2SeO3 | 30 |


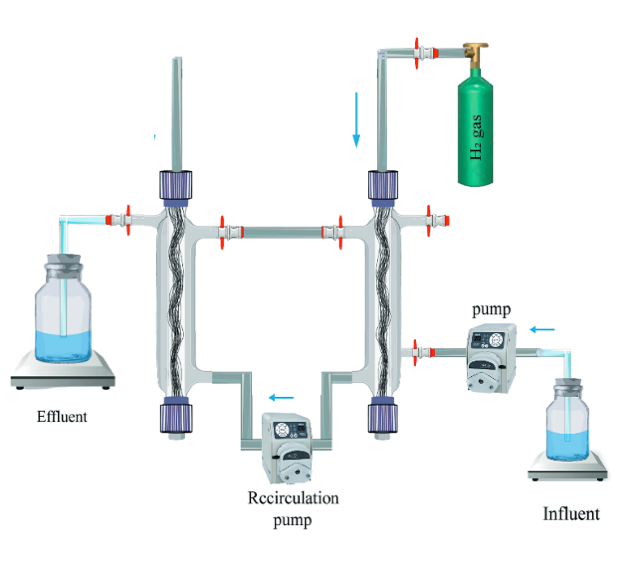


Fig. S1 The schematic diagram of the reactor configuration


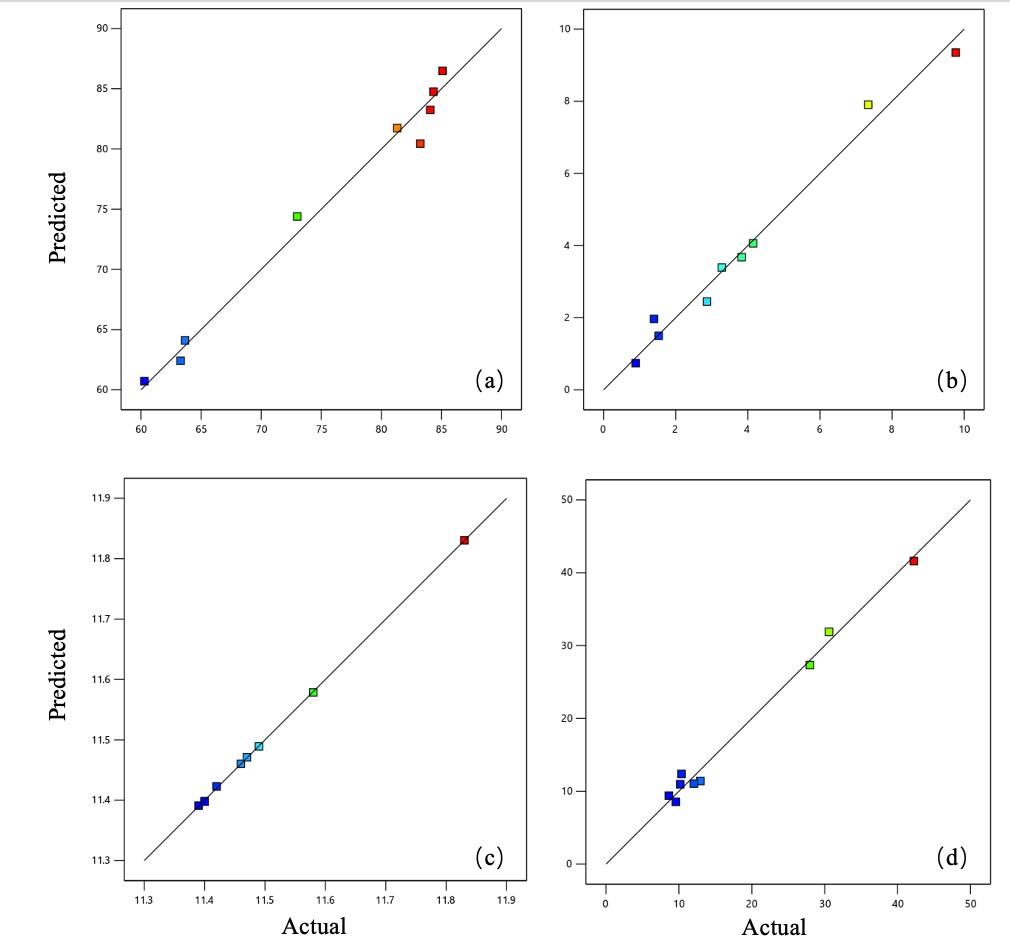


Fig. S2 The linear correlation of (a) ACR, (b) NAR, (c) pH and (d) TNR between the predicted value and the practical value


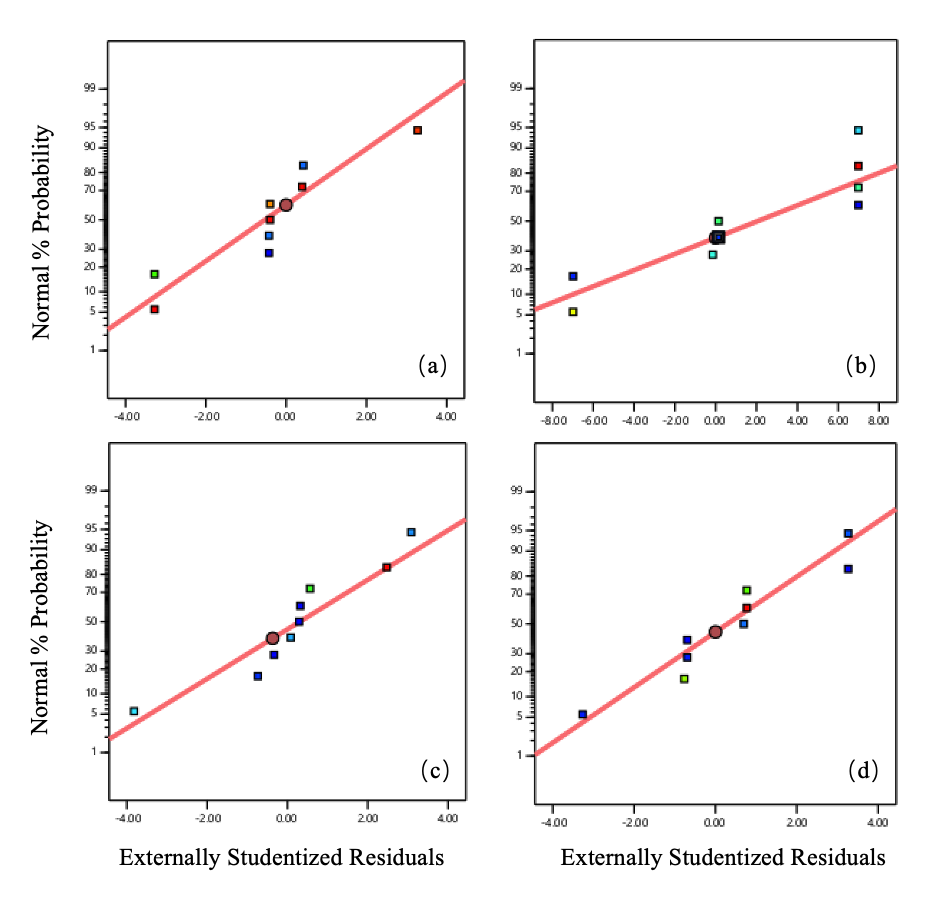


Fig. S3 The normal plot of (a) ACR, (b) NAR, (c) pH and (d) TNR of the externally studentized residuals
